# Supplementary material
Source: PubMed Central journal article supplement (PMC10423631)
Supplement: web_material_kwad021.pdf [file web_material_kwad021.pdf]

## WEB MATERIAL

### Time-Varying Exposures and Miscarriage: A Comparison of Statistical Models Through Simulation

Alexandra C. Sundermann, James C. Slaughter, Digna R. Velez Edwards, and Katherine E. Hartmann

#### Table of Contents

|                                                                                                                                                                                                           |    |
|-----------------------------------------------------------------------------------------------------------------------------------------------------------------------------------------------------------|----|
| Web Table 1. Characteristics of participants in Right From the Start, 2000–2012.....                                                                                                                      | 2  |
| Web Appendix 1. Questionnaire items about alcohol consumption in the first-trimester interview .....                                                                                                      | 3  |
| Web Table 2. Parameter assignment in simulation studies.....                                                                                                                                              | 4  |
| Web Appendix 2. Simulation code .....                                                                                                                                                                     | 6  |
| Web Table 3. Performance of four models under relationship 1 (exposure not related to miscarriage risk).....                                                                                              | 36 |
| Web Table 4. Comparison of confidence interval coverage <sup>a</sup> of estimates for gestational weeks 4–8 from 5 modeling approaches across 4 simulated relationships between exposure and outcome..... | 37 |

**Web Table 1.** Characteristics of participants in Right From the Start, 2000–2012

| Characteristic               | No.   | %    |
|------------------------------|-------|------|
| Maternal age, years          |       |      |
| <20                          | 190   | 3.5  |
| 20–24                        | 886   | 16.3 |
| 25–29                        | 1,859 | 34.3 |
| 30–34                        | 1,729 | 31.9 |
| ≥35                          | 760   | 14.0 |
| Ethnicity/race               |       |      |
| White, non-Hispanic          | 3,791 | 69.9 |
| Black, non-Hispanic          | 1,026 | 18.9 |
| Hispanic                     | 366   | 6.7  |
| Other                        | 238   | 4.4  |
| Refused                      | 3     | 0.1  |
| Body mass index <sup>a</sup> |       |      |
| Underweight                  | 135   | 2.5  |
| Normal weight                | 2,865 | 52.8 |
| Overweight                   | 1,269 | 23.4 |
| Obese                        | 1,092 | 20.1 |
| Missing                      | 63    | 1.2  |
| Marital status               |       |      |
| Married, cohabitating        | 4,839 | 89.2 |
| Other                        | 585   | 10.8 |
| History of miscarriage       |       |      |
| Yes                          | 4,137 | 76.3 |
| No                           | 1,207 | 22.3 |
| Missing                      | 80    | 1.5  |
| Annual income, \$            |       |      |
| ≤ 40,000                     | 1,654 | 30.5 |
| 40,001–80,000                | 1,947 | 35.9 |
| >80,000                      | 1,637 | 30.2 |
| Missing/Refused              | 186   | 3.4  |
| Education                    |       |      |
| High school or less          | 986   | 17.8 |
| Some college                 | 976   | 18.0 |
| College or more              | 3,479 | 64.1 |
| Missing                      | 1     | 0.0  |
| Alcohol use <sup>b</sup>     |       |      |
| Never exposed/distant quit   | 2,422 | 44.7 |
| Recent quit                  | 2,710 | 50.0 |
| Current user                 | 292   | 5.4  |
| Pregnancy intention          |       |      |
| Intended                     | 3,559 | 65.6 |
| Unintended                   | 1,470 | 27.1 |
| Missing                      | 395   | 7.3  |
| Pregnancy outcome            |       |      |
| Miscarriage                  | 649   | 12.0 |
| Other                        | 4,775 | 88.0 |

<sup>a</sup> Institute of Medicine classifications: underweight <18.5 kg/m<sup>2</sup>, normal weight 18.5–24.9 kg/m<sup>2</sup>, overweight 25.0–29.9 kg/m<sup>2</sup>, obese ≥30.0 kg/m<sup>2</sup>.

<sup>b</sup> Recent quitting was defined as cessation of alcohol use within 4 months of the first-trimester interview.

## WEB APPENDIX 1

### Questionnaire Items About Alcohol Consumption in the First-Trimester Interview

- Have you ever had alcoholic beverages, like beer, wine, or liquor including gin, whiskey, rum, or mixed drinks?
- At this time, do you drink any alcoholic beverages, like beer, wine, or liquor including gin, whiskey, rum, or mixed drinks?
- How often do you drink an alcoholic beverage, by that I mean at least one beer, one glass of wine, one mixed drink, or one shot of liquor? (*# times per day, week, or month, or less than once per month*).
- On those occasions that you drink alcoholic beverages, how many drinks do you usually have?
- At this time, what type(s) of alcohol do you usually drink? To make it easier for you to respond, I'm going to read you a list of options: beer, wine, mixed drinks, shot of liquor, other alcohol \_\_\_\_\_.
- Did you stop drinking alcoholic beverages in the past 4 months or more than 4 months ago?
- In the past 4 months, have you changed how often and/or how many alcoholic beverages you drink?
- When did this change occur?
- Do you remember what week in [month] that was, the first, second, third, fourth, or fifth?
- Before this change, how often did you drink? (*# times per day, week, or month, or less than once per month*).
- Before this change, on those occasions when you drank alcoholic beverages, how many drinks did you usually have on each occasion?
- What type(s) of alcohol did you usually drink? Did you drink beer, wine, mixed drinks, shot of liquor, other alcohol \_\_\_\_\_.
- In the past four months, have you had more than four drinks on any one occasion?
- How many times in the past four months have you had more than four drinks on any occasion?
- On those occasions when you had more than four drinks, what type(s) of alcohol did you usually drink? Did you drink beer, wine, mixed drinks, shot of liquor, other alcohol \_\_\_\_\_.

**Web Table 2.** Parameter assignment in simulation studies

| Parameter                                                            | Assignment Rule                                 | Comments                                                                                                                                       |
|----------------------------------------------------------------------|-------------------------------------------------|------------------------------------------------------------------------------------------------------------------------------------------------|
| Same across all simulations                                          |                                                 |                                                                                                                                                |
| Exposure status at time t=0                                          | $X \sim B(1, 0.5500)$                           |                                                                                                                                                |
| Exposure status at time t=140                                        | $X \sim B(1, 0.0900)$                           | Given an individual was exposed at time t=0                                                                                                    |
| Timing of change in exposure (days' gestation)                       | $(X \sim \text{Beta}(7, 5)) \cdot 100 - 30$     | Negative values denote a change that occurred prior to last menstrual period.                                                                  |
| Outcome timing (days' gestation)                                     | $(X \sim \text{Beta}(4.5, 8.6)) \cdot 126 + 14$ | Given pregnancy ends in miscarriage                                                                                                            |
| Specific to Relationship 1. Exposure not related to miscarriage risk |                                                 |                                                                                                                                                |
| Miscarriage risk                                                     | $X \sim B(1, 0.1235)$                           |                                                                                                                                                |
| Outcome timing (days' gestation)                                     | $(X \sim \text{Beta}(4.5, 8.6)) \cdot 126 + 14$ | Given pregnancy ends in miscarriage                                                                                                            |
| Specific to Relationship 2. Any exposure increases risk              |                                                 |                                                                                                                                                |
| Miscarriage risk given exposed in pregnancy                          | $X \sim B(1, 0.0969)$                           |                                                                                                                                                |
| Miscarriage risk given unexposed in pregnancy                        | $X \sim B(1, 0.1453)$                           |                                                                                                                                                |
| Specific to Relationship 3. Exposure in week five increases risk     |                                                 |                                                                                                                                                |
| Miscarriage risk given exposed in week five of pregnancy             | $X \sim B(1, 0.1698)$                           |                                                                                                                                                |
| Miscarriage risk given unexposed in week five of pregnancy           | $X \sim B(1, 0.1132)$                           | Includes both individuals who were unexposed and those whose exposure status change prior to week five                                         |
| Specific to Relationship 4. Cumulative exposure associates with risk |                                                 |                                                                                                                                                |
| Miscarriage risk given exposed in pregnancy                          | $X \sim B(1, 0.1060 \cdot 1.0137^{t-14})$       | $t$ equals outcome time if exposure change occurs after outcome or $t$ equals time of exposure change if exposure change occurs before outcome |
| Miscarriage risk given unexposed in pregnancy                        | $X \sim B(1, 0.1060)$                           | Includes individuals who were unexposed throughout pregnancy and whose exposure status change prior to day 14                                  |

Specific to Relationship 5. Exposure increases risk during the following week

Miscarriage risk given  
exposure within seven  
days of outcome  $X \sim B(1, 0.1960)$

Miscarriage risk given  
no exposure within  
seven days of outcome  $X \sim B(1, 0.1130)$

---

## WEB APPENDIX 2

### Simulation Code

```
*Time-Varying Exposures and Miscarriage: A Comparison of Approaches Through Simulation
*Written for Stata
*****
set more off
clear all
*****
*Relationship 1: Exposure not related to risk
program define null_p, rclass
clear
set obs 1500

gen id=_n

**Define Time-Varying Exposure Variables
gen early_exposed=rbinomial(1, 0.55)
gen late_exposed=rbinomial(1, 0.09) if early_exposed==1
replace late_exposed=0 if early_exposed==0

gen change_consump_time=rbeta(7,5)*100-30 if early_exposed==1

gen days=.
replace days=ceil(change_consump_time)-14
replace days=0 if days<0|days=.

gen gestwkchange=.
replace gestwkchange=0 if change_consump_time>=0 & change_consump_time<7
replace gestwkchange=1 if change_consump_time>=7 & change_consump_time<14
replace gestwkchange=2 if change_consump_time>=14 & change_consump_time<21
replace gestwkchange=3 if change_consump_time>=21 & change_consump_time<28
replace gestwkchange=4 if change_consump_time>=28 & change_consump_time<35
replace gestwkchange=5 if change_consump_time>=35 & change_consump_time<42
replace gestwkchange=6 if change_consump_time>=42 & change_consump_time<49
replace gestwkchange=7 if change_consump_time>=49 & change_consump_time<56
replace gestwkchange=8 if change_consump_time>=56 & change_consump_time<63
replace gestwkchange=9 if change_consump_time>=63 & change_consump_time<70
replace gestwkchange=10 if change_consump_time>=70 & change_consump_time<77
replace gestwkchange=11 if change_consump_time>=77 & change_consump_time<84
replace gestwkchange=12 if change_consump_time>=84 & change_consump_time<91
replace gestwkchange=13 if change_consump_time>=91 & change_consump_time<98
replace gestwkchange=14 if change_consump_time>=98 & change_consump_time~=.
replace gestwkchange=0 if change_consump_time<0 | (change_consump_time==. & late_exposed==0)
label define wkchanges 0 "No pregnancy exposure" 1 "0-6" 2 "7-13" 3 "14-20" 4 "21-27" 5 "28-34" 6 "35-41" ///
7 "42-48" 8 "49-55" 9 "56-62" 10 "63-69" 11 "70-76" 12 "77-83" 13 "84-90" 14 "No change or after 1st Tri"
label values gestwkchange wkchanges

**Week specific exposure
gen expose1=.
replace expose1=1 if gestwkchange>=1|late_exposed==1
replace expose1=0 if early_exposed==0|(gestwkchange<1 & late_exposed==0)

gen expose2=.
```

```

replace expose2=1 if gestwkchange>=2|late_exposed==1
replace expose2=0 if early_exposed==0|(gestwkchange<2 & late_exposed==0)

gen expose3=.
replace expose3=1 if gestwkchange>=3|late_exposed==1
replace expose3=0 if early_exposed==0|(gestwkchange<3 & late_exposed==0)

gen expose4=.
replace expose4=1 if gestwkchange>=4|late_exposed==1
replace expose4=0 if early_exposed==0|(gestwkchange<4 & late_exposed==0)

gen expose5=.
replace expose5=1 if gestwkchange>=5|late_exposed==1
replace expose5=0 if early_exposed==0|(gestwkchange<5 & late_exposed==0)

gen expose6=.
replace expose6=1 if gestwkchange>=6|late_exposed==1
replace expose6=0 if early_exposed==0|(gestwkchange<6 & late_exposed==0)

gen expose7=.
replace expose7=1 if gestwkchange>=7|late_exposed==1
replace expose7=0 if early_exposed==0|(gestwkchange<7 & late_exposed==0)

gen expose8=.
replace expose8=1 if gestwkchange>=8|late_exposed==1
replace expose8=0 if early_exposed==0|(gestwkchange<8 & late_exposed==0)

gen expose9=.
replace expose9=1 if gestwkchange>=9|late_exposed==1
replace expose9=0 if early_exposed==0|(gestwkchange<9 & late_exposed==0)

gen expose10=.
replace expose10=1 if gestwkchange>=10|late_exposed==1
replace expose10=0 if early_exposed==0|(gestwkchange<10 & late_exposed==0)

gen expose11=.
replace expose11=1 if gestwkchange>=11|late_exposed==1
replace expose11=0 if early_exposed==0|(gestwkchange<11 & late_exposed==0)

gen expose12=.
replace expose12=1 if gestwkchange>=12|late_exposed==1
replace expose12=0 if early_exposed==0|(gestwkchange<12 & late_exposed==0)

gen expose13=.
replace expose13=1 if gestwkchange>=13|late_exposed==1
replace expose13=0 if early_exposed==0|(gestwkchange<13 & late_exposed==0)

gen expose14=.
replace expose14=1 if gestwkchange>=14|late_exposed==1
replace expose14=0 if early_exposed==0|(gestwkchange<14 & late_exposed==0)

**Outcome
gen outcome=rbinomial(1, 0.1235)

**Outcome Timing
gen gaad=round(rbeta(4.5,8.6)*126+14) if outcome==1

```

```

replace gaad=140 if outcome==0
*****

*Run models to measure performance

stset gaad, id(id) failure(outcome)

*Simple Cox PH
stcox early_exposed
return scalar sr_b=_b[early_exposed]
return scalar sr_se=_se[early_exposed]
return scalar sr_test=1-chi2(e(df_m), e(chi2))

test _b[early_exposed]==0
return scalar sr_p=r(p)

*Sequential logistic
quietly logistic outcome expose3 if outcome==0|(outcome==1 & gaad>21)
estimate store week_3
return scalar sm_b3=_b[expose3]
return scalar sm_se3=_se[expose3]
test _b[expose3]==0
return scalar sm_p3=r(p)

quietly logistic outcome expose4 if outcome==0|(outcome==1 & gaad>28)
estimate store week_4
return scalar sm_b4=_b[expose4]
return scalar sm_se4=_se[expose4]
return scalar sm_test4=1-chi2(e(df_m), e(chi2))
test _b[expose4]==0
return scalar sm_p4=r(p)

quietly logistic outcome expose5 if outcome==0|(outcome==1 & gaad>35)
estimate store week_5
return scalar sm_b5=_b[expose5]
return scalar sm_se5=_se[expose5]
return scalar sm_test5=1-chi2(e(df_m), e(chi2))
test _b[expose5]==0
return scalar sm_p5=r(p)

quietly logistic outcome expose6 if outcome==0|(outcome==1 & gaad>42)
estimate store week_6
return scalar sm_b6=_b[expose6]
return scalar sm_se6=_se[expose6]
return scalar sm_test6=1-chi2(e(df_m), e(chi2))
test _b[expose6]==0
return scalar sm_p6=r(p)

quietly logistic outcome expose7 if outcome==0|(outcome==1 & gaad>49)
estimate store week_7
return scalar sm_b7=_b[expose7]
return scalar sm_se7=_se[expose7]
return scalar sm_test7=1-chi2(e(df_m), e(chi2))
test _b[expose7]==0
return scalar sm_p7=r(p)

quietly logistic outcome expose8 if outcome==0|(outcome==1 & gaad>56)

```



```

estimate store week_8
return scalar sm_b8=_b[expose8]
return scalar sm_se8=_se[expose8]
return scalar sm_test8=1-chi2(e(df_m), e(chi2))
test _b[expose8]==0
return scalar sm_p8=r(p)

quietly logistic outcome expose9 if outcome==0|(outcome==1 & gaad>63)
estimate store week_9
return scalar sm_b9=_b[expose9]
return scalar sm_se9=_se[expose9]
test _b[expose9]==0
return scalar sm_p9=r(p)

quietly logistic outcome expose10 if outcome==0|(outcome==1 & gaad>70)
estimate store week_10
return scalar sm_b10=_b[expose10]
return scalar sm_se10=_se[expose10]
test _b[expose10]==0
return scalar sm_p10=r(p)

quietly logistic outcome expose11 if outcome==0|(outcome==1 & gaad>77)
estimate store week_11
return scalar sm_b11=_b[expose11]
return scalar sm_se11=_se[expose11]
test _b[expose11]==0
return scalar sm_p11=r(p)

quietly logistic outcome expose12 if outcome==0|(outcome==1 & gaad>84)
estimate store week_12
return scalar sm_b12=_b[expose12]
return scalar sm_se12=_se[expose12]
test _b[expose12]==0
return scalar sm_p12=r(p)

quietly logistic outcome expose13 if outcome==0|(outcome==1 & gaad>91)
estimate store week_13
return scalar sm_b13=_b[expose13]
return scalar sm_se13=_se[expose13]
test _b[expose13]==0
return scalar sm_p13=r(p)

suest week_3 week_4 week_5 week_6 week_7 week_8 week_9 week_10 week_11 week_12 week_13

test (expose3=0) (expose4=0) (expose5=0) (expose6=0) (expose7=0) (expose8=0) ///
(expose9=0) (expose10=0) (expose11=0) (expose12=0) (expose13=0)

return scalar sm_exp3_13=r(p)

test (expose4=0) (expose5=0) (expose6=0) (expose7=0) (expose8=0)

return scalar sm_exp4_8=r(p)

*Cox with lag
stsplot split, at(1(1)140)

```

```

gen split_exposed=.
replace split_exposed=0 if early_exposed==0
replace split_exposed=1 if early_exposed==1 & late_exposed==0 & change_consump_time > (_t-7)
replace split_exposed=0 if early_exposed==1 & late_exposed==0 & change_consump_time < (_t-7)
replace split_exposed=1 if late_exposed==1

```

```

stcox split_exposed
return scalar lr_b1=_b[split_exposed]
return scalar lr_se1=_se[split_exposed]
return scalar lr_test=1-chi2(e(df_m), e(chi2))
test _b[split_exposed]==0
return scalar lr_p1=r(p)

```

\*Cumulative Cox regression

```

gen exp_dur=.
replace exp_dur=_t-13 if days>=_t
replace exp_dur=days if _t>days
replace exp_dur=0 if exp_dur<0
replace exp_dur=0 if change_consump_time<14|change_consump_time==.

```

```

stcox exp_dur
return scalar cc_b=_b[exp_dur]
return scalar cc_se=_se[exp_dur]
test _b[exp_dur]==0
return scalar cc_p=r(p)

```

\*Poisson regression with time interaction

```

gen split_exposed2=.
replace split_exposed2=0 if early_exposed==0
replace split_exposed2=1 if early_exposed==1 & late_exposed==0 & change_consump_time > (_t)
replace split_exposed2=0 if early_exposed==1 & late_exposed==0 & change_consump_time < (_t)
replace split_exposed2=1 if late_exposed==1

```

```

gen time = _t

```

```

fp generate double time^(-1 3), center scale replace

```

```

summ time_1 if time==28, meanonly
scalar t1_28=r(mean)

```

```

summ time_1 if time==35, meanonly
scalar t1_35=r(mean)

```

```

summ time_1 if time==42, meanonly
scalar t1_42=r(mean)

```

```

summ time_1 if time==49, meanonly
scalar t1_49=r(mean)

```

```

summ time_1 if time==56, meanonly
scalar t1_56=r(mean)

```

```

summ time_2 if time==28, meanonly
scalar t2_28=r(mean)

```

```

summ time_2 if time==35, meanonly

```

```

scalar t2_35=r(mean)

summ time_2 if time==42, meanonly
scalar t2_42=r(mean)

summ time_2 if time==49, meanonly
scalar t2_49=r(mean)

summ time_2 if time==56, meanonly
scalar t2_56=r(mean)

gen int1 = split_exposed2*time_1
gen int2 = split_exposed2*time_2

poisson_d split_exposed2 time_1 time_2 int1 int2, exposure(gaad)

lincom split_exposed2+int1*t1_28 +int2 * t2_28
return scalar pf2_b4=r(estimate)
return scalar pf2_se4=r(se)

lincom split_exposed2+int1*t1_35 +int2 * t2_35
return scalar pf2_b5=r(estimate)
return scalar pf2_se5=r(se)

lincom split_exposed2+int1*t1_42 +int2 * t2_42
return scalar pf2_b6=r(estimate)
return scalar pf2_se6=r(se)

lincom split_exposed2+int1*t1_49 +int2 * t2_49
return scalar pf2_b7=r(estimate)
return scalar pf2_se7=r(se)

lincom split_exposed2+int1*t1_56 +int2 * t2_56
return scalar pf2_b8=r(estimate)
return scalar pf2_se8=r(se)

test split_exposed2 int1 int2
return scalar pf2_p=r(p)

end
*****
*Relationship 1 Simulation
simulate sr_b=r(sr_b) sr_se=r(sr_se) sr_p=r(sr_p) sm_b4=r(sm_b4) sm_se4=r(sm_se4) sm_p4=r(sm_p4) ///
sm_b5=r(sm_b5) sm_se5=r(sm_se5) sm_p5=r(sm_p5) sm_b6=r(sm_b6) sm_se6=r(sm_se6) sm_p6=r(sm_p6) ///
sm_b7=r(sm_b7) sm_se7=r(sm_se7) sm_p7=r(sm_p7) sm_b8=r(sm_b8) sm_se8=r(sm_se8) sm_p8=r(sm_p8) ///
cc_b=r(cc_b) cc_se=r(cc_se) cc_p=r(cc_p) ///
lr_b1=r(lr_b1) lr_se1=r(lr_se1) lr_p1=r(lr_p1) sr_test=r(sr_test) sm_test4=r(sm_test4) ///
sm_test5=r(sm_test5) sm_test6=r(sm_test6) sm_test7=r(sm_test7) sm_test8=r(sm_test8) ///
sm_exp3_13=r(sm_exp3_13) sm_exp4_8=r(sm_exp4_8) lr_test=r(lr_test) ///
pf2_b4=r(pf2_b4) pf2_se4=r(pf2_se4) pf2_b5=r(pf2_b5) pf2_se5=r(pf2_se5) pf2_p=r(pf2_p) ///
pf2_b6=r(pf2_b6) pf2_se6=r(pf2_se6) pf2_b7=r(pf2_b7) pf2_se7=r(pf2_se7) pf2_b8=r(pf2_b8) pf2_se8=r(pf2_se8)
///
, reps(1000) seed(1714): null_p

clear
*****

```

```

*****
*****
*Relationship 2: Any exposure uniformly increases risk of loss
program define any_p, rclass
clear
set obs 1500

gen id=_n

**Define Time-Varying Exposure Variables
gen early_exposed=rbinomial(1, 0.55)
gen late_exposed=rbinomial(1, 0.09) if early_exposed==1
replace late_exposed=0 if early_exposed==0

gen change_consump_time=rbeta(7,5)*100-30 if early_exposed==1

gen days=.
replace days=ceil(change_consump_time)-14
replace days=0 if days<0|days==.

gen gestwkchange=.
replace gestwkchange=0 if change_consump_time>=0 & change_consump_time<7
replace gestwkchange=1 if change_consump_time>=7 & change_consump_time<14
replace gestwkchange=2 if change_consump_time>=14 & change_consump_time<21
replace gestwkchange=3 if change_consump_time>=21 & change_consump_time<28
replace gestwkchange=4 if change_consump_time>=28 & change_consump_time<35
replace gestwkchange=5 if change_consump_time>=35 & change_consump_time<42
replace gestwkchange=6 if change_consump_time>=42 & change_consump_time<49
replace gestwkchange=7 if change_consump_time>=49 & change_consump_time<56
replace gestwkchange=8 if change_consump_time>=56 & change_consump_time<63
replace gestwkchange=9 if change_consump_time>=63 & change_consump_time<70
replace gestwkchange=10 if change_consump_time>=70 & change_consump_time<77
replace gestwkchange=11 if change_consump_time>=77 & change_consump_time<84
replace gestwkchange=12 if change_consump_time>=84 & change_consump_time<91
replace gestwkchange=13 if change_consump_time>=91 & change_consump_time<98
replace gestwkchange=14 if change_consump_time>=98 & change_consump_time~=.
replace gestwkchange=0 if change_consump_time<0 | (change_consump_time==. & late_exposed==0)
label define wkchanges 0 "No pregnancy exposure" 1 "0-6" 2 "7-13" 3 "14-20" 4 "21-27" 5 "28-34" 6 "35-41" ///
7 "42-48" 8 "49-55" 9 "56-62" 10 "63-69" 11 "70-76" 12 "77-83" 13 "84-90" 14 "No change or after 1st Tri"
label values gestwkchange wkchanges

**Week specific exposure
gen expose1=.
replace expose1=1 if gestwkchange>=1|late_exposed==1
replace expose1=0 if early_exposed==0|(gestwkchange<1 & late_exposed==0)

gen expose2=.
replace expose2=1 if gestwkchange>=2|late_exposed==1
replace expose2=0 if early_exposed==0|(gestwkchange<2 & late_exposed==0)

gen expose3=.
replace expose3=1 if gestwkchange>=3|late_exposed==1
replace expose3=0 if early_exposed==0|(gestwkchange<3 & late_exposed==0)

gen expose4=.
replace expose4=1 if gestwkchange>=4|late_exposed==1

```

```

replace expose4=0 if early_exposed==0|(gestwkchange<4 & late_exposed==0)

gen expose5=.
replace expose5=1 if gestwkchange>=5|late_exposed==1
replace expose5=0 if early_exposed==0|(gestwkchange<5 & late_exposed==0)

gen expose6=.
replace expose6=1 if gestwkchange>=6|late_exposed==1
replace expose6=0 if early_exposed==0|(gestwkchange<6 & late_exposed==0)

gen expose7=.
replace expose7=1 if gestwkchange>=7|late_exposed==1
replace expose7=0 if early_exposed==0|(gestwkchange<7 & late_exposed==0)

gen expose8=.
replace expose8=1 if gestwkchange>=8|late_exposed==1
replace expose8=0 if early_exposed==0|(gestwkchange<8 & late_exposed==0)

gen expose9=.
replace expose9=1 if gestwkchange>=9|late_exposed==1
replace expose9=0 if early_exposed==0|(gestwkchange<9 & late_exposed==0)

gen expose10=.
replace expose10=1 if gestwkchange>=10|late_exposed==1
replace expose10=0 if early_exposed==0|(gestwkchange<10 & late_exposed==0)

gen expose11=.
replace expose11=1 if gestwkchange>=11|late_exposed==1
replace expose11=0 if early_exposed==0|(gestwkchange<11 & late_exposed==0)

gen expose12=.
replace expose12=1 if gestwkchange>=12|late_exposed==1
replace expose12=0 if early_exposed==0|(gestwkchange<12 & late_exposed==0)

gen expose13=.
replace expose13=1 if gestwkchange>=13|late_exposed==1
replace expose13=0 if early_exposed==0|(gestwkchange<13 & late_exposed==0)

gen expose14=.
replace expose14=1 if gestwkchange>=14|late_exposed==1
replace expose14=0 if early_exposed==0|(gestwkchange<14 & late_exposed==0)

**Outcome
gen outcome=rbinomial(1, 0.0968627) if early_exposed==0
replace outcome=rbinomial(1, 0.14529412) if early_exposed==1

**Outcome Timing
gen gaad=round(rbeta(4.5,8.6)*126+14) if outcome==1
replace gaad=140 if outcome==0
*****

*Run models to measure performance
stset gaad, id(id) failure(outcome)

*Simple Cox PH
stcox early_exposed

```

```

return scalar sr_b=_b[early_exposed]
return scalar sr_se=_se[early_exposed]
return scalar sr_test=1-chi2(e(df_m), e(chi2))

test_b[early_exposed]==0
return scalar sr_p=r(p)

*Sequential logistic
quietly logistic outcome expose3 if outcome==0|(outcome==1 & gaad>21)
estimate store week_3
return scalar sm_b3=_b[expose3]
return scalar sm_se3=_se[expose3]
test_b[expose3]==0
return scalar sm_p3=r(p)

quietly logistic outcome expose4 if outcome==0|(outcome==1 & gaad>28)
estimate store week_4
return scalar sm_b4=_b[expose4]
return scalar sm_se4=_se[expose4]
return scalar sm_test4=1-chi2(e(df_m), e(chi2))
test_b[expose4]==0
return scalar sm_p4=r(p)

quietly logistic outcome expose5 if outcome==0|(outcome==1 & gaad>35)
estimate store week_5
return scalar sm_b5=_b[expose5]
return scalar sm_se5=_se[expose5]
return scalar sm_test5=1-chi2(e(df_m), e(chi2))
test_b[expose5]==0
return scalar sm_p5=r(p)

quietly logistic outcome expose6 if outcome==0|(outcome==1 & gaad>42)
estimate store week_6
return scalar sm_b6=_b[expose6]
return scalar sm_se6=_se[expose6]
return scalar sm_test6=1-chi2(e(df_m), e(chi2))
test_b[expose6]==0
return scalar sm_p6=r(p)

quietly logistic outcome expose7 if outcome==0|(outcome==1 & gaad>49)
estimate store week_7
return scalar sm_b7=_b[expose7]
return scalar sm_se7=_se[expose7]
return scalar sm_test7=1-chi2(e(df_m), e(chi2))
test_b[expose7]==0
return scalar sm_p7=r(p)

quietly logistic outcome expose8 if outcome==0|(outcome==1 & gaad>56)
estimate store week_8
return scalar sm_b8=_b[expose8]
return scalar sm_se8=_se[expose8]
return scalar sm_test8=1-chi2(e(df_m), e(chi2))
test_b[expose8]==0
return scalar sm_p8=r(p)

quietly logistic outcome expose9 if outcome==0|(outcome==1 & gaad>63)

```

```

estimate store week_9
return scalar sm_b9=_b[expose9]
return scalar sm_se9=_se[expose9]
test _b[expose9]==0
return scalar sm_p9=r(p)

quietly logistic outcome expose10 if outcome==0|(outcome==1 & gaad>70)
estimate store week_10
return scalar sm_b10=_b[expose10]
return scalar sm_se10=_se[expose10]
test _b[expose10]==0
return scalar sm_p10=r(p)

quietly logistic outcome expose11 if outcome==0|(outcome==1 & gaad>77)
estimate store week_11
return scalar sm_b11=_b[expose11]
return scalar sm_se11=_se[expose11]
test _b[expose11]==0
return scalar sm_p11=r(p)

quietly logistic outcome expose12 if outcome==0|(outcome==1 & gaad>84)
estimate store week_12
return scalar sm_b12=_b[expose12]
return scalar sm_se12=_se[expose12]
test _b[expose12]==0
return scalar sm_p12=r(p)

quietly logistic outcome expose13 if outcome==0|(outcome==1 & gaad>91)
estimate store week_13
return scalar sm_b13=_b[expose13]
return scalar sm_se13=_se[expose13]
test _b[expose13]==0
return scalar sm_p13=r(p)

suest week_3 week_4 week_5 week_6 week_7 week_8 week_9 week_10 week_11 week_12 week_13

test (expose3=0) (expose4=0) (expose5=0) (expose6=0) (expose7=0) (expose8=0) ///
(expose9=0) (expose10=0) (expose11=0) (expose12=0) (expose13=0)

return scalar sm_exp3_13=r(p)

test (expose4=0) (expose5=0) (expose6=0) (expose7=0) (expose8=0)

return scalar sm_exp4_8=r(p)

*Cox with lag
stsplit split, at(1(1)140)

gen split_exposed=.
replace split_exposed=0 if early_exposed==0
replace split_exposed=1 if early_exposed==1 & late_exposed==0 & change_consump_time > (_t-7)
replace split_exposed=0 if early_exposed==1 & late_exposed==0 & change_consump_time < (_t-7)
replace split_exposed=1 if late_exposed==1

stcox split_exposed
return scalar lr_b1=_b[split_exposed]

```

```

return scalar lr_se1=_se[split_exposed]
return scalar lr_test=1-chi2(e(df_m), e(chi2))
test_b[split_exposed]==0
return scalar lr_p1=r(p)

*Cumulative Cox regression
gen exp_dur=.
replace exp_dur=_t-13 if days>=_t
replace exp_dur=days if _t>days
replace exp_dur=0 if exp_dur<0
replace exp_dur=0 if change_consump_time<14|change_consump_time==.

stcox exp_dur
return scalar cc_b=_b[exp_dur]
return scalar cc_se=_se[exp_dur]
test_b[exp_dur]==0
return scalar cc_p=r(p)

*Poisson regression with time ineration
gen split_exposed2=.
replace split_exposed2=0 if early_exposed==0
replace split_exposed2=1 if early_exposed==1 & late_exposed==0 & change_consump_time > (_t)
replace split_exposed2=0 if early_exposed==1 & late_exposed==0 & change_consump_time < (_t)
replace split_exposed2=1 if late_exposed==1

gen time = _t

fp generate double time^(-1 3), center scale replace

summ time_1 if time==28, meanonly
scalar t1_28=r(mean)

summ time_1 if time==35, meanonly
scalar t1_35=r(mean)

summ time_1 if time==42, meanonly
scalar t1_42=r(mean)

summ time_1 if time==49, meanonly
scalar t1_49=r(mean)

summ time_1 if time==56, meanonly
scalar t1_56=r(mean)

summ time_2 if time==28, meanonly
scalar t2_28=r(mean)

summ time_2 if time==35, meanonly
scalar t2_35=r(mean)

summ time_2 if time==42, meanonly
scalar t2_42=r(mean)

summ time_2 if time==49, meanonly
scalar t2_49=r(mean)

```



```

summ time_2 if time==56, meanonly
scalar t2_56=r(mean)

gen int1 = split_exposed2*time_1
gen int2 = split_exposed2*time_2

poisson _d split_exposed2 time_1 time_2 int1 int2, exposure(gaad)

lincom split_exposed2+int1*t1_28 +int2 * t2_28
return scalar pf2_b4=r(estimate)
return scalar pf2_se4=r(se)

lincom split_exposed2+int1*t1_35 +int2 * t2_35
return scalar pf2_b5=r(estimate)
return scalar pf2_se5=r(se)

lincom split_exposed2+int1*t1_42 +int2 * t2_42
return scalar pf2_b6=r(estimate)
return scalar pf2_se6=r(se)

lincom split_exposed2+int1*t1_49 +int2 * t2_49
return scalar pf2_b7=r(estimate)
return scalar pf2_se7=r(se)

lincom split_exposed2+int1*t1_56 +int2 * t2_56
return scalar pf2_b8=r(estimate)
return scalar pf2_se8=r(se)

test split_exposed2 int1 int2
return scalar pf2_p=r(p)

end
*****
*Relationship 2 Simulation
simulate sr_b=r(sr_b) sr_se=r(sr_se) sr_p=r(sr_p) sm_b4=r(sm_b4) sm_se4=r(sm_se4) sm_p4=r(sm_p4) ///
sm_b5=r(sm_b5) sm_se5=r(sm_se5) sm_p5=r(sm_p5) sm_b6=r(sm_b6) sm_se6=r(sm_se6) sm_p6=r(sm_p6) ///
sm_b7=r(sm_b7) sm_se7=r(sm_se7) sm_p7=r(sm_p7) sm_b8=r(sm_b8) sm_se8=r(sm_se8) sm_p8=r(sm_p8) ///
cc_b=r(cc_b) cc_se=r(cc_se) cc_p=r(cc_p) ///
lr_b1=r(lr_b1) lr_se1=r(lr_se1) lr_p1=r(lr_p1) sr_test=r(sr_test) sm_test4=r(sm_test4) ///
sm_test5=r(sm_test5) sm_test6=r(sm_test6) sm_test7=r(sm_test7) sm_test8=r(sm_test8) ///
sm_exp3_13=r(sm_exp3_13) sm_exp4_8=r(sm_exp4_8) lr_test=r(lr_test) ///
pf2_b4=r(pf2_b4) pf2_se4=r(pf2_se4) pf2_b5=r(pf2_b5) pf2_se5=r(pf2_se5) pf2_p=r(pf2_p) ///
pf2_b6=r(pf2_b6) pf2_se6=r(pf2_se6) pf2_b7=r(pf2_b7) pf2_se7=r(pf2_se7) pf2_b8=r(pf2_b8) pf2_se8=r(pf2_se8)
///
, reps(1000) seed(1714): any_p

clear
*****
*****
*****
*Relationship 3: Exposure in week five of gestation increases risk
program define week5_p, rclass
clear
set obs 1500

gen id=_n

```

\*\*Define Time-Varying Exposure Variables

gen early\_exposed=rbinomial(1, 0.55)

gen late\_exposed=rbinomial(1, 0.09) if early\_exposed==1

replace late\_exposed=0 if early\_exposed==0

gen change\_consump\_time=rbeta(7,5)\*100-30 if early\_exposed==1

gen days=.

replace days=ceil(change\_consump\_time)-14

replace days=0 if days<0|days=.

gen gestwkchange=.

replace gestwkchange=0 if change\_consump\_time>=0 & change\_consump\_time<7

replace gestwkchange=1 if change\_consump\_time>=7 & change\_consump\_time<14

replace gestwkchange=2 if change\_consump\_time>=14 & change\_consump\_time<21

replace gestwkchange=3 if change\_consump\_time>=21 & change\_consump\_time<28

replace gestwkchange=4 if change\_consump\_time>=28 & change\_consump\_time<35

replace gestwkchange=5 if change\_consump\_time>=35 & change\_consump\_time<42

replace gestwkchange=6 if change\_consump\_time>=42 & change\_consump\_time<49

replace gestwkchange=7 if change\_consump\_time>=49 & change\_consump\_time<56

replace gestwkchange=8 if change\_consump\_time>=56 & change\_consump\_time<63

replace gestwkchange=9 if change\_consump\_time>=63 & change\_consump\_time<70

replace gestwkchange=10 if change\_consump\_time>=70 & change\_consump\_time<77

replace gestwkchange=11 if change\_consump\_time>=77 & change\_consump\_time<84

replace gestwkchange=12 if change\_consump\_time>=84 & change\_consump\_time<91

replace gestwkchange=13 if change\_consump\_time>=91 & change\_consump\_time<98

replace gestwkchange=14 if change\_consump\_time>=98 & change\_consump\_time=.

replace gestwkchange=0 if change\_consump\_time<0 | (change\_consump\_time= . & late\_exposed==0)

label define wkchanges 0 "No pregnancy exposure" 1 "0-6" 2 "7-13" 3 "14-20" 4 "21-27" 5 "28-34" 6 "35-41" ///

7 "42-48" 8 "49-55" 9 "56-62" 10 "63-69" 11 "70-76" 12 "77-83" 13 "84-90" 14 "No change or after 1st Tri"

label values gestwkchange wkchanges

\*\*Week specific exposure

gen expose1=.

replace expose1=1 if gestwkchange>=1|late\_exposed==1

replace expose1=0 if early\_exposed==0|(gestwkchange<1 & late\_exposed==0)

gen expose2=.

replace expose2=1 if gestwkchange>=2|late\_exposed==1

replace expose2=0 if early\_exposed==0|(gestwkchange<2 & late\_exposed==0)

gen expose3=.

replace expose3=1 if gestwkchange>=3|late\_exposed==1

replace expose3=0 if early\_exposed==0|(gestwkchange<3 & late\_exposed==0)

gen expose4=.

replace expose4=1 if gestwkchange>=4|late\_exposed==1

replace expose4=0 if early\_exposed==0|(gestwkchange<4 & late\_exposed==0)

gen expose5=.

replace expose5=1 if gestwkchange>=5|late\_exposed==1

replace expose5=0 if early\_exposed==0|(gestwkchange<5 & late\_exposed==0)

gen expose6=.

replace expose6=1 if gestwkchange>=6|late\_exposed==1

```

replace expose6=0 if early_exposed==0|(gestwkchange<6 & late_exposed==0)

gen expose7=.
replace expose7=1 if gestwkchange>=7|late_exposed==1
replace expose7=0 if early_exposed==0|(gestwkchange<7 & late_exposed==0)

gen expose8=.
replace expose8=1 if gestwkchange>=8|late_exposed==1
replace expose8=0 if early_exposed==0|(gestwkchange<8 & late_exposed==0)

gen expose9=.
replace expose9=1 if gestwkchange>=9|late_exposed==1
replace expose9=0 if early_exposed==0|(gestwkchange<9 & late_exposed==0)

gen expose10=.
replace expose10=1 if gestwkchange>=10|late_exposed==1
replace expose10=0 if early_exposed==0|(gestwkchange<10 & late_exposed==0)

gen expose11=.
replace expose11=1 if gestwkchange>=11|late_exposed==1
replace expose11=0 if early_exposed==0|(gestwkchange<11 & late_exposed==0)

gen expose12=.
replace expose12=1 if gestwkchange>=12|late_exposed==1
replace expose12=0 if early_exposed==0|(gestwkchange<12 & late_exposed==0)

gen expose13=.
replace expose13=1 if gestwkchange>=13|late_exposed==1
replace expose13=0 if early_exposed==0|(gestwkchange<13 & late_exposed==0)

gen expose14=.
replace expose14=1 if gestwkchange>=14|late_exposed==1
replace expose14=0 if early_exposed==0|(gestwkchange<14 & late_exposed==0)

**Outcome
gen outcome=rbinomial(1, 0.1131766227) if (early_exposed==0| early_exposed==1 & change_consump_time<35)
replace outcome=rbinomial(1, 0.169764934) if early_exposed==1 & change_consump_time>=35
*Found the right proportion with http://homepage.divms.uiowa.edu/~mbogнар/applets/beta.html

**Outcome Timing
gen gaad=round(rbeta(4.5,8.6)*126+14) if outcome==1
replace gaad=140 if outcome==0
*****

*Run models to measure performance
stset gaad, id(id) failure(outcome)

*Simple Cox PH
stcox early_exposed
return scalar sr_b=_b[early_exposed]
return scalar sr_se=_se[early_exposed]
return scalar sr_test=1-chi2(e(df_m), e(chi2))

test _b[early_exposed]==0
return scalar sr_p=r(p)

```

```

*Sequential logistic
quietly logistic outcome expose3 if outcome==0|(outcome==1 & gaad>21)
estimate store week_3
return scalar sm_b3=_b[expose3]
return scalar sm_se3=_se[expose3]
test _b[expose3]==0
return scalar sm_p3=r(p)

quietly logistic outcome expose4 if outcome==0|(outcome==1 & gaad>28)
estimate store week_4
return scalar sm_b4=_b[expose4]
return scalar sm_se4=_se[expose4]
return scalar sm_test4=1-chi2(e(df_m), e(chi2))
test _b[expose4]==0
return scalar sm_p4=r(p)

quietly logistic outcome expose5 if outcome==0|(outcome==1 & gaad>35)
estimate store week_5
return scalar sm_b5=_b[expose5]
return scalar sm_se5=_se[expose5]
return scalar sm_test5=1-chi2(e(df_m), e(chi2))
test _b[expose5]==0
return scalar sm_p5=r(p)

quietly logistic outcome expose6 if outcome==0|(outcome==1 & gaad>42)
estimate store week_6
return scalar sm_b6=_b[expose6]
return scalar sm_se6=_se[expose6]
return scalar sm_test6=1-chi2(e(df_m), e(chi2))
test _b[expose6]==0
return scalar sm_p6=r(p)

quietly logistic outcome expose7 if outcome==0|(outcome==1 & gaad>49)
estimate store week_7
return scalar sm_b7=_b[expose7]
return scalar sm_se7=_se[expose7]
return scalar sm_test7=1-chi2(e(df_m), e(chi2))
test _b[expose7]==0
return scalar sm_p7=r(p)

quietly logistic outcome expose8 if outcome==0|(outcome==1 & gaad>56)
estimate store week_8
return scalar sm_b8=_b[expose8]
return scalar sm_se8=_se[expose8]
return scalar sm_test8=1-chi2(e(df_m), e(chi2))
test _b[expose8]==0
return scalar sm_p8=r(p)

quietly logistic outcome expose9 if outcome==0|(outcome==1 & gaad>63)
estimate store week_9
return scalar sm_b9=_b[expose9]
return scalar sm_se9=_se[expose9]
test _b[expose9]==0
return scalar sm_p9=r(p)

quietly logistic outcome expose10 if outcome==0|(outcome==1 & gaad>70)

```

```

estimate store week_10
return scalar sm_b10=_b[expose10]
return scalar sm_se10=_se[expose10]
test _b[expose10]==0
return scalar sm_p10=r(p)

quietly logistic outcome expose11 if outcome==0|(outcome==1 & gaad>77)
estimate store week_11
return scalar sm_b11=_b[expose11]
return scalar sm_se11=_se[expose11]
test _b[expose11]==0
return scalar sm_p11=r(p)

quietly logistic outcome expose12 if outcome==0|(outcome==1 & gaad>84)
estimate store week_12
return scalar sm_b12=_b[expose12]
return scalar sm_se12=_se[expose12]
test _b[expose12]==0
return scalar sm_p12=r(p)

quietly logistic outcome expose13 if outcome==0|(outcome==1 & gaad>91)
estimate store week_13
return scalar sm_b13=_b[expose13]
return scalar sm_se13=_se[expose13]
test _b[expose13]==0
return scalar sm_p13=r(p)

suest week_3 week_4 week_5 week_6 week_7 week_8 week_9 week_10 week_11 week_12 week_13

test (expose3=0) (expose4=0) (expose5=0) (expose6=0) (expose7=0) (expose8=0) ///
(expose9=0) (expose10=0) (expose11=0) (expose12=0) (expose13=0)

return scalar sm_exp3_13=r(p)

test (expose4=0) (expose5=0) (expose6=0) (expose7=0) (expose8=0)

return scalar sm_exp4_8=r(p)

*Cox with lag
stsplitt split, at(1(1)140)

gen split_exposed=.
replace split_exposed=0 if early_exposed==0
replace split_exposed=1 if early_exposed==1 & late_exposed==0 & change_consump_time > (_t-7)
replace split_exposed=0 if early_exposed==1 & late_exposed==0 & change_consump_time < (_t-7)
replace split_exposed=1 if late_exposed==1

stcox split_exposed
return scalar lr_b1=_b[split_exposed]
return scalar lr_se1=_se[split_exposed]
return scalar lr_test=1-chi2(e(df_m), e(chi2))
test _b[split_exposed]==0
return scalar lr_p1=r(p)

*Cumulative Cox regression
gen exp_dur=.

```

```

replace exp_dur=_t-13 if days>=_t
replace exp_dur=days if _t>days
replace exp_dur=0 if exp_dur<0
replace exp_dur=0 if change_consump_time<14|change_consump_time==.

```

```

stcox exp_dur
return scalar cc_b=_b[exp_dur]
return scalar cc_se=_se[exp_dur]
test _b[exp_dur]==0
return scalar cc_p=r(p)

```

```

*Poisson regression with time ineration
gen split_exposed2=.
replace split_exposed2=0 if early_exposed==0
replace split_exposed2=1 if early_exposed==1 & late_exposed==0 & change_consump_time > (_t)
replace split_exposed2=0 if early_exposed==1 & late_exposed==0 & change_consump_time < (_t)
replace split_exposed2=1 if late_exposed==1

```

```
gen time = _t
```

```
fp generate double time^(-1 3), center scale replace
```

```
summ time_1 if time==28, meanonly
scalar t1_28=r(mean)

```

```
summ time_1 if time==35, meanonly
scalar t1_35=r(mean)

```

```
summ time_1 if time==42, meanonly
scalar t1_42=r(mean)

```

```
summ time_1 if time==49, meanonly
scalar t1_49=r(mean)

```

```
summ time_1 if time==56, meanonly
scalar t1_56=r(mean)

```

```
summ time_2 if time==28, meanonly
scalar t2_28=r(mean)

```

```
summ time_2 if time==35, meanonly
scalar t2_35=r(mean)

```

```
summ time_2 if time==42, meanonly
scalar t2_42=r(mean)

```

```
summ time_2 if time==49, meanonly
scalar t2_49=r(mean)

```

```
summ time_2 if time==56, meanonly
scalar t2_56=r(mean)

```

```
gen int1 = split_exposed2*time_1
gen int2 = split_exposed2*time_2

```

```
*Poisson with interaction
```

```

poisson _d split_exposed2 time_1 time_2 int1 int2, exposure(gaad)

lincom split_exposed2+int1*t1_28 +int2 * t2_28
return scalar pf2_b4=r(estimate)
return scalar pf2_se4=r(se)

lincom split_exposed2+int1*t1_35 +int2 * t2_35
return scalar pf2_b5=r(estimate)
return scalar pf2_se5=r(se)

lincom split_exposed2+int1*t1_42 +int2 * t2_42
return scalar pf2_b6=r(estimate)
return scalar pf2_se6=r(se)

lincom split_exposed2+int1*t1_49 +int2 * t2_49
return scalar pf2_b7=r(estimate)
return scalar pf2_se7=r(se)

lincom split_exposed2+int1*t1_56 +int2 * t2_56
return scalar pf2_b8=r(estimate)
return scalar pf2_se8=r(se)

test split_exposed2 int1 int2
return scalar pf2_p=r(p)

end
*****
*Relationship 3 Simulation
simulate sr_b=r(sr_b) sr_se=r(sr_se) sr_p=r(sr_p) sm_b4=r(sm_b4) sm_se4=r(sm_se4) sm_p4=r(sm_p4) ///
sm_b5=r(sm_b5) sm_se5=r(sm_se5) sm_p5=r(sm_p5) sm_b6=r(sm_b6) sm_se6=r(sm_se6) sm_p6=r(sm_p6) ///
sm_b7=r(sm_b7) sm_se7=r(sm_se7) sm_p7=r(sm_p7) sm_b8=r(sm_b8) sm_se8=r(sm_se8) sm_p8=r(sm_p8) ///
cc_b=r(cc_b) cc_se=r(cc_se) cc_p=r(cc_p) ///
lr_b1=r(lr_b1) lr_se1=r(lr_se1) lr_p1=r(lr_p1) sr_test=r(sr_test) sm_test4=r(sm_test4) ///
sm_test5=r(sm_test5) sm_test6=r(sm_test6) sm_test7=r(sm_test7) sm_test8=r(sm_test8) ///
sm_exp3_13=r(sm_exp3_13) sm_exp4_8=r(sm_exp4_8) lr_test=r(lr_test) ///
pf2_b4=r(pf2_b4) pf2_se4=r(pf2_se4) pf2_b5=r(pf2_b5) pf2_se5=r(pf2_se5) pf2_p=r(pf2_p) ///
pf2_b6=r(pf2_b6) pf2_se6=r(pf2_se6) pf2_b7=r(pf2_b7) pf2_se7=r(pf2_se7) pf2_b8=r(pf2_b8) pf2_se8=r(pf2_se8)
///
, reps(1000) seed(1714): week5_p

clear
*****
*****
*****
*Relationship 4: Cumulative exposure associates with risk
program define cumulative, rclass
clear
set obs 1500

gen id=_n

**Define Time-Varying Exposure Variables
gen early_exposed=rbinomial(1, 0.55)
gen late_exposed=rbinomial(1, 0.09) if early_exposed==1
replace late_exposed=0 if early_exposed==0

```

```

gen change_consump_time=rbeta(7,5)*100-30 if early_exposed==1

gen days=.
replace days=ceil(change_consump_time)-14
replace days=0 if days<0|days==.

gen gestwkchange=.
replace gestwkchange=0 if change_consump_time>=0 & change_consump_time<7
replace gestwkchange=1 if change_consump_time>=7 & change_consump_time<14
replace gestwkchange=2 if change_consump_time>=14 & change_consump_time<21
replace gestwkchange=3 if change_consump_time>=21 & change_consump_time<28
replace gestwkchange=4 if change_consump_time>=28 & change_consump_time<35
replace gestwkchange=5 if change_consump_time>=35 & change_consump_time<42
replace gestwkchange=6 if change_consump_time>=42 & change_consump_time<49
replace gestwkchange=7 if change_consump_time>=49 & change_consump_time<56
replace gestwkchange=8 if change_consump_time>=56 & change_consump_time<63
replace gestwkchange=9 if change_consump_time>=63 & change_consump_time<70
replace gestwkchange=10 if change_consump_time>=70 & change_consump_time<77
replace gestwkchange=11 if change_consump_time>=77 & change_consump_time<84
replace gestwkchange=12 if change_consump_time>=84 & change_consump_time<91
replace gestwkchange=13 if change_consump_time>=91 & change_consump_time<98
replace gestwkchange=14 if change_consump_time>=98 & change_consump_time~=.
replace gestwkchange=0 if change_consump_time<0 | (change_consump_time==. & late_exposed==0)
label define wkchanges 0 "No pregnancy exposure" 1 "0-6" 2 "7-13" 3 "14-20" 4 "21-27" 5 "28-34" 6 "35-41" ///
7 "42-48" 8 "49-55" 9 "56-62" 10 "63-69" 11 "70-76" 12 "77-83" 13 "84-90" 14 "No change or after 1st Tri"
label values gestwkchange wkchanges

**Week specific exposure
gen expose1=.
replace expose1=1 if gestwkchange>=1|late_exposed==1
replace expose1=0 if early_exposed==0|(gestwkchange<1 & late_exposed==0)

gen expose2=.
replace expose2=1 if gestwkchange>=2|late_exposed==1
replace expose2=0 if early_exposed==0|(gestwkchange<2 & late_exposed==0)

gen expose3=.
replace expose3=1 if gestwkchange>=3|late_exposed==1
replace expose3=0 if early_exposed==0|(gestwkchange<3 & late_exposed==0)

gen expose4=.
replace expose4=1 if gestwkchange>=4|late_exposed==1
replace expose4=0 if early_exposed==0|(gestwkchange<4 & late_exposed==0)

gen expose5=.
replace expose5=1 if gestwkchange>=5|late_exposed==1
replace expose5=0 if early_exposed==0|(gestwkchange<5 & late_exposed==0)

gen expose6=.
replace expose6=1 if gestwkchange>=6|late_exposed==1
replace expose6=0 if early_exposed==0|(gestwkchange<6 & late_exposed==0)

gen expose7=.
replace expose7=1 if gestwkchange>=7|late_exposed==1
replace expose7=0 if early_exposed==0|(gestwkchange<7 & late_exposed==0)

```



```

gen expose8=.
replace expose8=1 if gestwkchange>=8|late_exposed==1
replace expose8=0 if early_exposed==0|(gestwkchange<8 & late_exposed==0)

gen expose9=.
replace expose9=1 if gestwkchange>=9|late_exposed==1
replace expose9=0 if early_exposed==0|(gestwkchange<9 & late_exposed==0)

gen expose10=.
replace expose10=1 if gestwkchange>=10|late_exposed==1
replace expose10=0 if early_exposed==0|(gestwkchange<10 & late_exposed==0)

gen expose11=.
replace expose11=1 if gestwkchange>=11|late_exposed==1
replace expose11=0 if early_exposed==0|(gestwkchange<11 & late_exposed==0)

gen expose12=.
replace expose12=1 if gestwkchange>=12|late_exposed==1
replace expose12=0 if early_exposed==0|(gestwkchange<12 & late_exposed==0)

gen expose13=.
replace expose13=1 if gestwkchange>=13|late_exposed==1
replace expose13=0 if early_exposed==0|(gestwkchange<13 & late_exposed==0)

gen expose14=.
replace expose14=1 if gestwkchange>=14|late_exposed==1
replace expose14=0 if early_exposed==0|(gestwkchange<14 & late_exposed==0)

**Outcome Timing
gen gaad=round(rbeta(4.5,8.6)*126+14)

**Outcome
gen outcome=.
replace outcome=rbinomial(1, 0.106*1.0137^(change_consump_time-14)) if early_exposed==1 &
change_consump_time>=14 & gaad>change_consump_time
replace outcome=rbinomial(1, 0.106*1.0137^(gaad-14)) if early_exposed==1 & change_consump_time>=14 &
gaad<=change_consump_time
replace outcome=rbinomial(1, 0.106) if early_exposed==0 | (early_exposed==1 & change_consump_time<14)

replace gaad=140 if outcome==0

*****

*Run models to measure performance
stset gaad, id(id) failure(outcome)

*Simple Cox PH
stcox early_exposed
return scalar sr_b=_b[early_exposed]
return scalar sr_se=_se[early_exposed]
return scalar sr_test=1-chi2(e(df_m), e(chi2))

test _b[early_exposed]==0
return scalar sr_p=r(p)

*Sequential logistic
quietly logistic outcome expose3 if outcome==0|(outcome==1 & gaad>21)
estimate store week_3

```

```
return scalar sm_b3=_b[expose3]
return scalar sm_se3=_se[expose3]
test _b[expose3]=0
return scalar sm_p3=r(p)
```

```
quietly logistic outcome expose4 if outcome==0|(outcome==1 & gaad>28)
estimate store week_4
return scalar sm_b4=_b[expose4]
return scalar sm_se4=_se[expose4]
return scalar sm_test4=1-chi2(e(df_m), e(chi2))
test _b[expose4]=0
return scalar sm_p4=r(p)
```

```
quietly logistic outcome expose5 if outcome==0|(outcome==1 & gaad>35)
estimate store week_5
return scalar sm_b5=_b[expose5]
return scalar sm_se5=_se[expose5]
return scalar sm_test5=1-chi2(e(df_m), e(chi2))
test _b[expose5]=0
return scalar sm_p5=r(p)
```

```
quietly logistic outcome expose6 if outcome==0|(outcome==1 & gaad>42)
estimate store week_6
return scalar sm_b6=_b[expose6]
return scalar sm_se6=_se[expose6]
return scalar sm_test6=1-chi2(e(df_m), e(chi2))
test _b[expose6]=0
return scalar sm_p6=r(p)
```

```
quietly logistic outcome expose7 if outcome==0|(outcome==1 & gaad>49)
estimate store week_7
return scalar sm_b7=_b[expose7]
return scalar sm_se7=_se[expose7]
return scalar sm_test7=1-chi2(e(df_m), e(chi2))
test _b[expose7]=0
return scalar sm_p7=r(p)
```

```
quietly logistic outcome expose8 if outcome==0|(outcome==1 & gaad>56)
estimate store week_8
return scalar sm_b8=_b[expose8]
return scalar sm_se8=_se[expose8]
return scalar sm_test8=1-chi2(e(df_m), e(chi2))
test _b[expose8]=0
return scalar sm_p8=r(p)
```

```
quietly logistic outcome expose9 if outcome==0|(outcome==1 & gaad>63)
estimate store week_9
return scalar sm_b9=_b[expose9]
return scalar sm_se9=_se[expose9]
test _b[expose9]=0
return scalar sm_p9=r(p)
```

```
quietly logistic outcome expose10 if outcome==0|(outcome==1 & gaad>70)
estimate store week_10
return scalar sm_b10=_b[expose10]
return scalar sm_se10=_se[expose10]
```

```

test _b[expose10]==0
return scalar sm_p10=r(p)

quietly logistic outcome expose11 if outcome==0|(outcome==1 & gaad>77)
estimate store week_11
return scalar sm_b11=_b[expose11]
return scalar sm_se11=_se[expose11]
test _b[expose11]==0
return scalar sm_p11=r(p)

quietly logistic outcome expose12 if outcome==0|(outcome==1 & gaad>84)
estimate store week_12
return scalar sm_b12=_b[expose12]
return scalar sm_se12=_se[expose12]
test _b[expose12]==0
return scalar sm_p12=r(p)

quietly logistic outcome expose13 if outcome==0|(outcome==1 & gaad>91)
estimate store week_13
return scalar sm_b13=_b[expose13]
return scalar sm_se13=_se[expose13]
test _b[expose13]==0
return scalar sm_p13=r(p)

suest week_3 week_4 week_5 week_6 week_7 week_8 week_9 week_10 week_11 week_12 week_13

test (expose3=0) (expose4=0) (expose5=0) (expose6=0) (expose7=0) (expose8=0) ///
(expose9=0) (expose10=0) (expose11=0) (expose12=0) (expose13=0)

return scalar sm_exp3_13=r(p)

test (expose4=0) (expose5=0) (expose6=0) (expose7=0) (expose8=0)

return scalar sm_exp4_8=r(p)

*Cox with lag
stsplit split, at(1(1)140)

gen split_exposed=.
replace split_exposed=0 if early_exposed==0
replace split_exposed=1 if early_exposed==1 & late_exposed==0 & change_consump_time > (_t-7)
replace split_exposed=0 if early_exposed==1 & late_exposed==0 & change_consump_time < (_t-7)
replace split_exposed=1 if late_exposed==1

stcox split_exposed
return scalar lr_b1=_b[split_exposed]
return scalar lr_se1=_se[split_exposed]
return scalar lr_test=1-chi2(e(df_m), e(chi2))
test _b[split_exposed]==0
return scalar lr_p1=r(p)

*Cumulative Cox regression
gen exp_dur=.
replace exp_dur=_t-13 if days>=_t
replace exp_dur=days if _t>days
replace exp_dur=0 if exp_dur<0

```

```
replace exp_dur=0 if change_consump_time<14|change_consump_time==.
```

```
stcox exp_dur  
return scalar cc_b=_b[exp_dur]  
return scalar cc_se=_se[exp_dur]  
test _b[exp_dur]==0  
return scalar cc_p=r(p)
```

```
*Poisson regression with time ineration
```

```
gen split_exposed2=  
replace split_exposed2=0 if early_exposed==0  
replace split_exposed2=1 if early_exposed==1 & late_exposed==0 & change_consump_time > (_t)  
replace split_exposed2=0 if early_exposed==1 & late_exposed==0 & change_consump_time < (_t)  
replace split_exposed2=1 if late_exposed==1
```

```
gen time = _t
```

```
fp generate double time^(-1 3), center scale replace
```

```
summ time_1 if time==28, meanonly  
scalar t1_28=r(mean)
```

```
summ time_1 if time==35, meanonly  
scalar t1_35=r(mean)
```

```
summ time_1 if time==42, meanonly  
scalar t1_42=r(mean)
```

```
summ time_1 if time==49, meanonly  
scalar t1_49=r(mean)
```

```
summ time_1 if time==56, meanonly  
scalar t1_56=r(mean)
```

```
summ time_2 if time==28, meanonly  
scalar t2_28=r(mean)
```

```
summ time_2 if time==35, meanonly  
scalar t2_35=r(mean)
```

```
summ time_2 if time==42, meanonly  
scalar t2_42=r(mean)
```

```
summ time_2 if time==49, meanonly  
scalar t2_49=r(mean)
```

```
summ time_2 if time==56, meanonly  
scalar t2_56=r(mean)
```

```
gen int1 = split_exposed2*time_1  
gen int2 = split_exposed2*time_2
```

```
poisson _d split_exposed2 time_1 time_2 int1 int2, exposure(gaad)
```

```
lincom split_exposed2+int1*t1_28 +int2 * t2_28  
return scalar pf2_b4=r(estimate)
```

```

return scalar pf2_se4=r(se)

lincom split_exposed2+int1*t1_35 +int2 * t2_35
return scalar pf2_b5=r(estimate)
return scalar pf2_se5=r(se)

lincom split_exposed2+int1*t1_42 +int2 * t2_42
return scalar pf2_b6=r(estimate)
return scalar pf2_se6=r(se)

lincom split_exposed2+int1*t1_49 +int2 * t2_49
return scalar pf2_b7=r(estimate)
return scalar pf2_se7=r(se)

lincom split_exposed2+int1*t1_56 +int2 * t2_56
return scalar pf2_b8=r(estimate)
return scalar pf2_se8=r(se)

test split_exposed2 int1 int2
return scalar pf2_p=r(p)

end
*****
*Relationship 4 Simulation
simulate sr_b=r(sr_b) sr_se=r(sr_se) sr_p=r(sr_p) sm_b4=r(sm_b4) sm_se4=r(sm_se4) sm_p4=r(sm_p4) ///
sm_b5=r(sm_b5) sm_se5=r(sm_se5) sm_p5=r(sm_p5) sm_b6=r(sm_b6) sm_se6=r(sm_se6) sm_p6=r(sm_p6) ///
sm_b7=r(sm_b7) sm_se7=r(sm_se7) sm_p7=r(sm_p7) sm_b8=r(sm_b8) sm_se8=r(sm_se8) sm_p8=r(sm_p8) ///
cc_b=r(cc_b) cc_se=r(cc_se) cc_p=r(cc_p) ///
lr_b1=r(lr_b1) lr_se1=r(lr_se1) lr_p1=r(lr_p1) sr_test=r(sr_test) sm_test4=r(sm_test4) ///
sm_test5=r(sm_test5) sm_test6=r(sm_test6) sm_test7=r(sm_test7) sm_test8=r(sm_test8) ///
sm_exp3_13=r(sm_exp3_13) sm_exp4_8=r(sm_exp4_8) lr_test=r(lr_test) ///
pf2_b4=r(pf2_b4) pf2_se4=r(pf2_se4) pf2_b5=r(pf2_b5) pf2_se5=r(pf2_se5) pf2_p=r(pf2_p) ///
pf2_b6=r(pf2_b6) pf2_se6=r(pf2_se6) pf2_b7=r(pf2_b7) pf2_se7=r(pf2_se7) pf2_b8=r(pf2_b8) pf2_se8=r(pf2_se8)
///
, reps(1000) seed(1714): cumulative

clear
*****
*****
*****
*Relationship 5: Exposure increases risk during the following week
program define steady, rclass
*Starting
clear
set obs 1500

gen id=_n

**Define Time-Varying Exposure Variables
gen early_exposed=rbinomial(1, 0.55)
gen late_exposed=rbinomial(1, 0.09) if early_exposed==1
replace late_exposed=0 if early_exposed==0

gen change_consump_time=rbeta(7,5)*100-30 if early_exposed==1

gen days=.

```

```
replace days=ceil(change_consump_time)-14
replace days=0 if days<0|days=.
```

```
gen gestwkchange=.
```

```
replace gestwkchange=0 if change_consump_time>=0 & change_consump_time<7
replace gestwkchange=1 if change_consump_time>=7 & change_consump_time<14
replace gestwkchange=2 if change_consump_time>=14 & change_consump_time<21
replace gestwkchange=3 if change_consump_time>=21 & change_consump_time<28
replace gestwkchange=4 if change_consump_time>=28 & change_consump_time<35
replace gestwkchange=5 if change_consump_time>=35 & change_consump_time<42
replace gestwkchange=6 if change_consump_time>=42 & change_consump_time<49
replace gestwkchange=7 if change_consump_time>=49 & change_consump_time<56
replace gestwkchange=8 if change_consump_time>=56 & change_consump_time<63
replace gestwkchange=9 if change_consump_time>=63 & change_consump_time<70
replace gestwkchange=10 if change_consump_time>=70 & change_consump_time<77
replace gestwkchange=11 if change_consump_time>=77 & change_consump_time<84
replace gestwkchange=12 if change_consump_time>=84 & change_consump_time<91
replace gestwkchange=13 if change_consump_time>=91 & change_consump_time<98
replace gestwkchange=14 if change_consump_time>=98 & change_consump_time=.
```

```
replace gestwkchange=0 if change_consump_time<0 | (change_consump_time= & late_exposed==0)
label define wkchanges 0 "No pregnancy exposure" 1 "0-6" 2 "7-13" 3 "14-20" 4 "21-27" 5 "28-34" 6 "35-41" ///
7 "42-48" 8 "49-55" 9 "56-62" 10 "63-69" 11 "70-76" 12 "77-83" 13 "84-90" 14 "No change or after 1st Tri"
label values gestwkchange wkchanges
```

```
**Week specific exposure
```

```
gen expose1=.
```

```
replace expose1=1 if gestwkchange>=1|late_exposed==1
replace expose1=0 if early_exposed==0|(gestwkchange<1 & late_exposed==0)
```

```
gen expose2=.
```

```
replace expose2=1 if gestwkchange>=2|late_exposed==1
replace expose2=0 if early_exposed==0|(gestwkchange<2 & late_exposed==0)
```

```
gen expose3=.
```

```
replace expose3=1 if gestwkchange>=3|late_exposed==1
replace expose3=0 if early_exposed==0|(gestwkchange<3 & late_exposed==0)
```

```
gen expose4=.
```

```
replace expose4=1 if gestwkchange>=4|late_exposed==1
replace expose4=0 if early_exposed==0|(gestwkchange<4 & late_exposed==0)
```

```
gen expose5=.
```

```
replace expose5=1 if gestwkchange>=5|late_exposed==1
replace expose5=0 if early_exposed==0|(gestwkchange<5 & late_exposed==0)
```

```
gen expose6=.
```

```
replace expose6=1 if gestwkchange>=6|late_exposed==1
replace expose6=0 if early_exposed==0|(gestwkchange<6 & late_exposed==0)
```

```
gen expose7=.
```

```
replace expose7=1 if gestwkchange>=7|late_exposed==1
replace expose7=0 if early_exposed==0|(gestwkchange<7 & late_exposed==0)
```

```
gen expose8=.
```

```
replace expose8=1 if gestwkchange>=8|late_exposed==1
replace expose8=0 if early_exposed==0|(gestwkchange<8 & late_exposed==0)
```

```

gen expose9=.
replace expose9=1 if gestwkchange>=9|late_exposed==1
replace expose9=0 if early_exposed==0|(gestwkchange<9 & late_exposed==0)

gen expose10=.
replace expose10=1 if gestwkchange>=10|late_exposed==1
replace expose10=0 if early_exposed==0|(gestwkchange<10 & late_exposed==0)

gen expose11=.
replace expose11=1 if gestwkchange>=11|late_exposed==1
replace expose11=0 if early_exposed==0|(gestwkchange<11 & late_exposed==0)

gen expose12=.
replace expose12=1 if gestwkchange>=12|late_exposed==1
replace expose12=0 if early_exposed==0|(gestwkchange<12 & late_exposed==0)

gen expose13=.
replace expose13=1 if gestwkchange>=13|late_exposed==1
replace expose13=0 if early_exposed==0|(gestwkchange<13 & late_exposed==0)

gen expose14=.
replace expose14=1 if gestwkchange>=14|late_exposed==1
replace expose14=0 if early_exposed==0|(gestwkchange<14 & late_exposed==0)

**Outcome
gen gaad=round(rbeta(4.5,8.6)*126+14)

gen outcome=.
replace outcome=rbinomial(1, 0.19645) if change_consump_time>=gaad-7 & early_exposed==1
replace outcome=rbinomial(1, 0.11335) if early_exposed==0|(change_consump_time<gaad-7 & early_exposed==1)

**Outcome Timing
replace gaad=140 if outcome==0

*****

*Run models to measure performance
stset gaad, id(id) failure(outcome)

*Simple Cox PH
stcox early_exposed
return scalar sr_b=_b[early_exposed]
return scalar sr_se=_se[early_exposed]
return scalar sr_test=1-chi2(e(df_m), e(chi2))

test _b[early_exposed]==0
return scalar sr_p=r(p)

*Sequential logistic
quietly logistic outcome expose3 if outcome==0|(outcome==1 & gaad>21)
estimate store week_3
return scalar sm_b3=_b[expose3]
return scalar sm_se3=_se[expose3]
test _b[expose3]==0
return scalar sm_p3=r(p)

```

```
quietly logistic outcome expose4 if outcome==0|(outcome==1 & gaad>28)
estimate store week_4
return scalar sm_b4=_b[expose4]
return scalar sm_se4=_se[expose4]
return scalar sm_test4=1-chi2(e(df_m), e(chi2))
test_b[expose4]==0
return scalar sm_p4=r(p)
```

```
quietly logistic outcome expose5 if outcome==0|(outcome==1 & gaad>35)
estimate store week_5
return scalar sm_b5=_b[expose5]
return scalar sm_se5=_se[expose5]
return scalar sm_test5=1-chi2(e(df_m), e(chi2))
test_b[expose5]==0
return scalar sm_p5=r(p)
```

```
quietly logistic outcome expose6 if outcome==0|(outcome==1 & gaad>42)
estimate store week_6
return scalar sm_b6=_b[expose6]
return scalar sm_se6=_se[expose6]
return scalar sm_test6=1-chi2(e(df_m), e(chi2))
test_b[expose6]==0
return scalar sm_p6=r(p)
```

```
quietly logistic outcome expose7 if outcome==0|(outcome==1 & gaad>49)
estimate store week_7
return scalar sm_b7=_b[expose7]
return scalar sm_se7=_se[expose7]
return scalar sm_test7=1-chi2(e(df_m), e(chi2))
test_b[expose7]==0
return scalar sm_p7=r(p)
```

```
quietly logistic outcome expose8 if outcome==0|(outcome==1 & gaad>56)
estimate store week_8
return scalar sm_b8=_b[expose8]
return scalar sm_se8=_se[expose8]
return scalar sm_test8=1-chi2(e(df_m), e(chi2))
test_b[expose8]==0
return scalar sm_p8=r(p)
```

```
quietly logistic outcome expose9 if outcome==0|(outcome==1 & gaad>63)
estimate store week_9
return scalar sm_b9=_b[expose9]
return scalar sm_se9=_se[expose9]
test_b[expose9]==0
return scalar sm_p9=r(p)
```

```
quietly logistic outcome expose10 if outcome==0|(outcome==1 & gaad>70)
estimate store week_10
return scalar sm_b10=_b[expose10]
return scalar sm_se10=_se[expose10]
test_b[expose10]==0
return scalar sm_p10=r(p)
```

```
quietly logistic outcome expose11 if outcome==0|(outcome==1 & gaad>77)
estimate store week_11
```



```

return scalar sm_b11=_b[expose11]
return scalar sm_se11=_se[expose11]
test _b[expose11]==0
return scalar sm_p11=r(p)

quietly logistic outcome expose12 if outcome==0|(outcome==1 & gaad>84)
estimate store week_12
return scalar sm_b12=_b[expose12]
return scalar sm_se12=_se[expose12]
test _b[expose12]==0
return scalar sm_p12=r(p)

quietly logistic outcome expose13 if outcome==0|(outcome==1 & gaad>91)
estimate store week_13
return scalar sm_b13=_b[expose13]
return scalar sm_se13=_se[expose13]
test _b[expose13]==0
return scalar sm_p13=r(p)

suest week_3 week_4 week_5 week_6 week_7 week_8 week_9 week_10 week_11 week_12 week_13

test (expose3=0) (expose4=0) (expose5=0) (expose6=0) (expose7=0) (expose8=0) ///
(expose9=0) (expose10=0) (expose11=0) (expose12=0) (expose13=0)

return scalar sm_exp3_13=r(p)

test (expose4=0) (expose5=0) (expose6=0) (expose7=0) (expose8=0)

return scalar sm_exp4_8=r(p)

*Cox with lag
stsplot split, at(1(1)140)

gen split_exposed=.
replace split_exposed=0 if early_exposed==0
replace split_exposed=1 if early_exposed==1 & late_exposed==0 & change_consump_time > (_t-7)
replace split_exposed=0 if early_exposed==1 & late_exposed==0 & change_consump_time < (_t-7)
replace split_exposed=1 if late_exposed==1

stcox split_exposed
return scalar lr_b1=_b[split_exposed]
return scalar lr_se1=_se[split_exposed]
return scalar lr_test=1-chi2(e(df_m), e(chi2))
test _b[split_exposed]==0
return scalar lr_p1=r(p)

*Cumulative Cox regression
gen exp_dur=.
replace exp_dur=_t-13 if days>=_t
replace exp_dur=days if _t>days
replace exp_dur=0 if exp_dur<0
replace exp_dur=0 if change_consump_time<14|change_consump_time==.

stcox exp_dur
return scalar cc_b=_b[exp_dur]
return scalar cc_se=_se[exp_dur]

```

```

test_b[exp_dur]==0
return scalar cc_p=r(p)

*Poisson regression with time ineration
gen split_exposed2=.
replace split_exposed2=0 if early_exposed==0
replace split_exposed2=1 if early_exposed==1 & late_exposed==0 & change_consump_time > (_t)
replace split_exposed2=0 if early_exposed==1 & late_exposed==0 & change_consump_time < (_t)
replace split_exposed2=1 if late_exposed==1

gen time = _t

fp generate double time^(-1 3), center scale replace

summ time_1 if time==28, meanonly
scalar t1_28=r(mean)

summ time_1 if time==35, meanonly
scalar t1_35=r(mean)

summ time_1 if time==42, meanonly
scalar t1_42=r(mean)

summ time_1 if time==49, meanonly
scalar t1_49=r(mean)

summ time_1 if time==56, meanonly
scalar t1_56=r(mean)

summ time_2 if time==28, meanonly
scalar t2_28=r(mean)

summ time_2 if time==35, meanonly
scalar t2_35=r(mean)

summ time_2 if time==42, meanonly
scalar t2_42=r(mean)

summ time_2 if time==49, meanonly
scalar t2_49=r(mean)

summ time_2 if time==56, meanonly
scalar t2_56=r(mean)

gen int1 = split_exposed2*time_1
gen int2 = split_exposed2*time_2

poisson _d split_exposed2 time_1 time_2 int1 int2, exposure(gaad)

lincom split_exposed2+int1*t1_28 +int2 * t2_28
return scalar pf2_b4=r(estimate)
return scalar pf2_se4=r(se)

lincom split_exposed2+int1*t1_35 +int2 * t2_35
return scalar pf2_b5=r(estimate)
return scalar pf2_se5=r(se)

```

```
lincom split_exposed2+int1*t1_42 +int2 * t2_42
return scalar pf2_b6=r(estimate)
return scalar pf2_se6=r(se)
```

```
lincom split_exposed2+int1*t1_49 +int2 * t2_49
return scalar pf2_b7=r(estimate)
return scalar pf2_se7=r(se)
```

```
lincom split_exposed2+int1*t1_56 +int2 * t2_56
return scalar pf2_b8=r(estimate)
return scalar pf2_se8=r(se)
```

```
test split_exposed2 int1 int2
return scalar pf2_p=r(p)
```

```
end
```

```
*****
```

```
*Relationship 5 Simulation
```

```
simulate sr_b=r(sr_b) sr_se=r(sr_se) sr_p=r(sr_p) sm_b4=r(sm_b4) sm_se4=r(sm_se4) sm_p4=r(sm_p4) ///
sm_b5=r(sm_b5) sm_se5=r(sm_se5) sm_p5=r(sm_p5) sm_b6=r(sm_b6) sm_se6=r(sm_se6) sm_p6=r(sm_p6) ///
sm_b7=r(sm_b7) sm_se7=r(sm_se7) sm_p7=r(sm_p7) sm_b8=r(sm_b8) sm_se8=r(sm_se8) sm_p8=r(sm_p8) ///
cc_b=r(cc_b) cc_se=r(cc_se) cc_p=r(cc_p) ///
lr_b1=r(lr_b1) lr_se1=r(lr_se1) lr_p1=r(lr_p1) sr_test=r(sr_test) sm_test4=r(sm_test4) ///
sm_test5=r(sm_test5) sm_test6=r(sm_test6) sm_test7=r(sm_test7) sm_test8=r(sm_test8) ///
sm_exp3_13=r(sm_exp3_13) sm_exp4_8=r(sm_exp4_8) lr_test=r(lr_test) ///
pf2_b4=r(pf2_b4) pf2_se4=r(pf2_se4) pf2_b5=r(pf2_b5) pf2_se5=r(pf2_se5) pf2_p=r(pf2_p) ///
pf2_b6=r(pf2_b6) pf2_se6=r(pf2_se6) pf2_b7=r(pf2_b7) pf2_se7=r(pf2_se7) pf2_b8=r(pf2_b8) pf2_se8=r(pf2_se8)
///
, reps(1000) seed(1714): steady
```

```
clear
```

**Web Table 3.** Performance of four models under relationship 1 (exposure not related to miscarriage risk)

|                            | Simple |       | Lag  |       | Sequential |       |       |       | Poisson |      |      |       | Cumulative |      |       |       |       |
|----------------------------|--------|-------|------|-------|------------|-------|-------|-------|---------|------|------|-------|------------|------|-------|-------|-------|
| Week                       | N/A    | N/A   | 4    | 5     | 6          | 7     | 8     | 4     | 5       | 6    | 7    | 8     | 4          | 5    | 6     | 7     | 8     |
| True effect <sup>a,b</sup> | 0      | 0     | 0    | 0     | 0          | 0     | 0     | 0     | 0       | 0    | 0    | 0     | 0          | 0    | 0     | 0     | 0     |
| Mean effect <sup>a,b</sup> | 0.00   | -0.02 | 0.00 | -0.01 | -0.02      | -0.06 | -0.12 | -0.26 | -0.07   | 0.01 | 0.02 | -0.04 | 0.00       | 0.00 | -0.01 | -0.01 | -0.01 |
| Bias <sup>c</sup>          | 0.00   | -0.02 | 0.00 | -0.01 | -0.02      | -0.06 | -0.12 | -0.26 | -0.07   | 0.01 | 0.02 | -0.04 | 0.00       | 0.00 | -0.01 | -0.01 | -0.01 |
| RMSE                       | 0.15   | 0.24  | 0.17 | 0.20  | 0.26       | 0.37  | 0.54  | 0.67  | 0.39    | 0.34 | 0.49 | 0.88  | 0.08       | 0.13 | 0.17  | 0.21  | 0.25  |
| Coverage                   | 0.94   | 0.96  | 0.96 | 0.95  | 0.95       | 0.96  | 0.97  | 0.99  | 0.96    | 0.93 | 0.94 | 0.96  | 0.93       | 0.93 | 0.93  | 0.93  | 0.93  |
| Power <sup>d</sup>         | 0.06   | 0.04  | 0.04 | 0.05  | 0.05       | 0.04  | 0.03  | 0.02  | 0.04    | 0.07 | 0.06 | 0.04  | 0.07       | 0.07 | 0.07  | 0.07  | 0.07  |

Abbreviation: RMSE, root mean squared error.

<sup>a</sup> On the natural log scale.

<sup>b</sup> Effect estimate is  $\beta_1$  for the simple, lag, and sequential models and a linear combination for the Poisson and cumulative models.

<sup>c</sup> Mean  $\ln(\text{effect estimate}) - \ln(\text{effect estimate})$ .

<sup>d</sup> Proportion of confidence intervals not including the null.

**Web Table 4.** Comparison of confidence interval coverage<sup>a</sup> of estimates for gestational weeks 4–8 from 5 modeling approaches across 4 simulated relationships between exposure and outcome

| <b>Scenario</b>                                                  | <b>Simple</b> | <b>Lag</b> | <b>Sequential</b> | <b>Poisson</b> | <b>Cumulative</b> |
|------------------------------------------------------------------|---------------|------------|-------------------|----------------|-------------------|
| Relationship 2-Any exposure increases risk                       |               |            |                   |                |                   |
| Week 4                                                           | 0.965         | 0.876      | 0.886             | 0.972          | 0.091             |
| Week 5                                                           | 0.965         | 0.876      | 0.870             | 0.934          | 0.696             |
| Week 6                                                           | 0.965         | 0.876      | 0.896             | 0.930          | 0.907             |
| Week 7                                                           | 0.965         | 0.876      | 0.933             | 0.954          | 0.934             |
| Week 8                                                           | 0.965         | 0.876      | 0.972             | 0.953          | 0.926             |
| Relationship 3-Exposure in week five increases risk              |               |            |                   |                |                   |
| Week 4                                                           | 0.817         | 0.764      | 0.563             | 0.943          | 0.442             |
| Week 5                                                           | 0.626         | 0.897      | 0.954             | 0.936          | 0.716             |
| Week 6                                                           | 0.817         | 0.764      | 0.719             | 0.819          | 0.442             |
| Week 7                                                           | 0.817         | 0.764      | 0.881             | 0.828          | 0.442             |
| Week 8                                                           | 0.817         | 0.764      | 0.949             | 0.881          | 0.442             |
| Relationship 4-Cumulative exposure associates with risk          |               |            |                   |                |                   |
| Week 4                                                           | 0.943         | 0.947      | 0.887             | 0.975          | 0.919             |
| Week 5                                                           | 0.916         | 0.955      | 0.941             | 0.957          | 0.919             |
| Week 6                                                           | 0.808         | 0.904      | 0.943             | 0.943          | 0.919             |
| Week 7                                                           | 0.621         | 0.809      | 0.939             | 0.920          | 0.919             |
| Week 8                                                           | 0.400         | 0.657      | 0.927             | 0.849          | 0.919             |
| Relationship 5-Exposure increases risk during the following week |               |            |                   |                |                   |
| Week 4                                                           | 0.543         | 0.965      | 0.760             | 0.987          | 0.022             |
| Week 5                                                           | 0.543         | 0.965      | 0.837             | 0.965          | 0.492             |
| Week 6                                                           | 0.543         | 0.965      | 0.865             | 0.954          | 0.794             |
| Week 7                                                           | 0.543         | 0.965      | 0.906             | 0.964          | 0.902             |
| Week 8                                                           | 0.543         | 0.965      | 0.965             | 0.960          | 0.931             |

<sup>a</sup>Coverage was defined as the proportion of simulations where the confidence intervals for the effect estimates included the true effect.
